# Supplementary material for: Describing the factors related to rural podiatry work and retention in the podiatry workforce: a national survey
Source: Springer Nature journal article supplement (doi:10.1186/s13047-023-00603-5), 2023-01-01
Supplement: MOESM2 [file 24003148]

**Default Question Block****PAIGE****Podiatrists in Australia - Investigating Graduate Employment.**

---

Many health professionals are confronted with burnout and their own mental health challenges. We are interested in determining how these challenges affect you. This is the 2nd survey of the PAIGE study, we strongly encourage you to repeat this survey even if you completed it in 2017 as it will collect **different** information in addition to any workplace or life changes.

You are invited to take part in this research if you are a podiatrist working in Victoria, Australia. We are interested in **EVERY** Victorian podiatrist being part of this study. Your responses are essential for this research to achieve it's aims.

Detailed information about these factors are essential for future workforce planning in the podiatry profession. This study is similar to others underway in medicine and nursing. Exploration of these factors has not been undertaken in this detail for allied health and particularly not in the podiatry profession.

The information that you provide in the PAIGE study will be used to:

- Understand how life impacts on workplace decisions
- Improve the access to podiatry services for every Victorian, particularly in rural and regional areas
- Improve the evidence base informing podiatry workforce policy

This research is being undertaken by researchers at Monash University (Dr Cylie Williams, Dr Jenni White, Dr Deborah Russell, Dr Belinda O'Sullivan, Anna Couch and Prof Terry Haines) and La Trobe University (Prof Hylton Menz).

---

It is not expected that you will directly benefit from this research and there is no payment for being part of this research.

At the end of the survey, you may choose to enter a draw to win:

- One (1) Apple Iphone 7
- One (1) of three (3) \$100 Coles Myer gift cards.
- One (1) of six (6) \$50 Coles Myer gift cards

This survey will take between 20-40 minutes. You can complete it in your own time and it is important that the whole survey is completed.

You can withdraw at any time by closing your Internet browser window. Being part of this study is voluntary. However, if you do consent and answer questions, anything you have answered may be used within the research. You will not be able to withdraw the answers to any questions you have answered.

If you choose to leave your contact details for any reason such as to participate in the gift card draw or so you can receive results, you can be assured that your contact details will not be subsequently linked to your survey responses.

*This study has been funded by the Australian Podiatry Education and Research Foundation.*

---

The results of this survey are confidential and you will not be asked to give any identifying information in a way that your results can be matched to you. Answers are being collected through Qualtrics and you can access the privacy policy here: <https://www.qualtrics.com/privacy-statement/>

Any provided details will only be viewed by the research team. The collected responses will be stored in accordance with Australian Privacy Regulations, and will be kept as a password protected data file stored on a cloud based server for 15 years. If there is future funding of this project, your responses to this survey may be linked to your responses in future surveys. A report of this study will be submitted for publication. No individual responses will be identified in any publications.

A newsletter containing key survey results and information about how results are being used to advance the podiatry profession will be produced during this project. You have the option to provide your email address to receive this at the end of the survey. It will not be linked with your survey responses.

---

If you would like to contact the research team about aspects of this study or have a complaint concerning the manner in which this research is being conducted, please contact the principal investigator:

Cylie Williams: [cylie.williams@monash.edu](mailto:cylie.williams@monash.edu)  
Ph: (03) 9784 2678

OR

Should you have any concerns or complaints about the conduct of the project, you are welcome to contact:

Executive Officer, Monash University Human Research Ethics (MUHREC)

Room 111, Chancellery Building E, 24 Sports Walk, Clayton Campus  
 Research Office, Monash University  
 Tel: +61 3 9905 2052      Email: [muhrec@monash.edu](mailto:muhrec@monash.edu)

Fax: +61 3 9905 3831

If you completed the 1st survey in 2017 please enter the same code that you created in survey one.

If this is the first PAIGE survey you have complete and to consent to being part of this research, please create your code to enable your answers to be linked during subsequent rounds.

To create this code, please use:

- **Your two (2) initials and two (2) digits of the date in the month of your birthday.**

e.g. Cylie Williams and birthday date in the month is 28, the code example is CW28

If you have a double surname (e.g. Smith-Peterson), only the first initial - S should be used as the code should be only 4 digits.

1. Have you completed the Round 1 PAIGE survey

- Yes
- No
- Can't remember

2. Are you in the same job since the beginning of 2017?

- Yes
- No

**A) About your job satisfaction**

1. Please indicate how satisfied or dissatisfied you are with each of the various aspects of your job

|                                                                       | Very dissatisfied     | Moderately dissatisfied | Neither satisfied or dissatisfied | Moderately satisfied  | Very satisfied        | Not applicable        |
|-----------------------------------------------------------------------|-----------------------|-------------------------|-----------------------------------|-----------------------|-----------------------|-----------------------|
| Freedom to choose your own method of working                          | <input type="radio"/> | <input type="radio"/>   | <input type="radio"/>             | <input type="radio"/> | <input type="radio"/> | <input type="radio"/> |
| Amount of variety in your work                                        | <input type="radio"/> | <input type="radio"/>   | <input type="radio"/>             | <input type="radio"/> | <input type="radio"/> | <input type="radio"/> |
| Physical working conditions                                           | <input type="radio"/> | <input type="radio"/>   | <input type="radio"/>             | <input type="radio"/> | <input type="radio"/> | <input type="radio"/> |
| Opportunities to use your abilities                                   | <input type="radio"/> | <input type="radio"/>   | <input type="radio"/>             | <input type="radio"/> | <input type="radio"/> | <input type="radio"/> |
| Your colleagues and fellow workers                                    | <input type="radio"/> | <input type="radio"/>   | <input type="radio"/>             | <input type="radio"/> | <input type="radio"/> | <input type="radio"/> |
| Recognition you get for good work                                     | <input type="radio"/> | <input type="radio"/>   | <input type="radio"/>             | <input type="radio"/> | <input type="radio"/> | <input type="radio"/> |
| Your hours of work                                                    | <input type="radio"/> | <input type="radio"/>   | <input type="radio"/>             | <input type="radio"/> | <input type="radio"/> | <input type="radio"/> |
| Your remuneration                                                     | <input type="radio"/> | <input type="radio"/>   | <input type="radio"/>             | <input type="radio"/> | <input type="radio"/> | <input type="radio"/> |
| Amount of responsibility you are given                                | <input type="radio"/> | <input type="radio"/>   | <input type="radio"/>             | <input type="radio"/> | <input type="radio"/> | <input type="radio"/> |
| Taking everything into consideration, how do you feel about your job? | <input type="radio"/> | <input type="radio"/>   | <input type="radio"/>             | <input type="radio"/> | <input type="radio"/> | <input type="radio"/> |

2. Please indicate the degree to which you agree or disagree with the following statements

|                                                                             | Strongly disagree     | Disagree              | Neutral               | Agree                 | Strongly Agree        | Not applicable        |
|-----------------------------------------------------------------------------|-----------------------|-----------------------|-----------------------|-----------------------|-----------------------|-----------------------|
| The balance between my personal and professional commitments is about right | <input type="radio"/> | <input type="radio"/> | <input type="radio"/> | <input type="radio"/> | <input type="radio"/> | <input type="radio"/> |

|                                                                                                                         | Strongly disagree     | Disagree              | Neutral               | Agree                 | Strongly Agree        | Not applicable        |
|-------------------------------------------------------------------------------------------------------------------------|-----------------------|-----------------------|-----------------------|-----------------------|-----------------------|-----------------------|
| I have a poor support network of other podiatrists like me                                                              | <input type="radio"/> | <input type="radio"/> | <input type="radio"/> | <input type="radio"/> | <input type="radio"/> | <input type="radio"/> |
| It is difficult to take time off when I want to                                                                         | <input type="radio"/> | <input type="radio"/> | <input type="radio"/> | <input type="radio"/> | <input type="radio"/> | <input type="radio"/> |
| I can take time off at short notice, for example if one of my children is ill or for a home emergency                   | <input type="radio"/> | <input type="radio"/> | <input type="radio"/> | <input type="radio"/> | <input type="radio"/> | <input type="radio"/> |
| My patients have unrealistic expectations about how I can help them                                                     | <input type="radio"/> | <input type="radio"/> | <input type="radio"/> | <input type="radio"/> | <input type="radio"/> | <input type="radio"/> |
| The majority of my patients have complex health and social problems                                                     | <input type="radio"/> | <input type="radio"/> | <input type="radio"/> | <input type="radio"/> | <input type="radio"/> | <input type="radio"/> |
| I have good support and supervision from podiatrists with advanced skills (ie: Sports, Paediatrics, High Risk, Surgery) | <input type="radio"/> | <input type="radio"/> | <input type="radio"/> | <input type="radio"/> | <input type="radio"/> | <input type="radio"/> |
| The hours I work are unpredictable                                                                                      | <input type="radio"/> | <input type="radio"/> | <input type="radio"/> | <input type="radio"/> | <input type="radio"/> | <input type="radio"/> |
| Running my practice is stressful most of the time                                                                       | <input type="radio"/> | <input type="radio"/> | <input type="radio"/> | <input type="radio"/> | <input type="radio"/> | <input type="radio"/> |
| I often undertake tasks that somebody less qualified could do                                                           | <input type="radio"/> | <input type="radio"/> | <input type="radio"/> | <input type="radio"/> | <input type="radio"/> | <input type="radio"/> |
| I cannot work my preferred hours due to a lack of jobs offering those hours                                             | <input type="radio"/> | <input type="radio"/> | <input type="radio"/> | <input type="radio"/> | <input type="radio"/> | <input type="radio"/> |

3. Would you like to change your hours of work?

- No
- Yes, I'd like to increase my hours
- Yes, I'd like to decrease my hours

**B) About your career development**

1. Do you plan to apply for Australian Podiatry Council Career Framework in Paediatric, Sports or High Risk Foot or to the Australasian College of Podiatric Surgeons (ACPS)?

- Yes
- Unsure
- No, I'm already enrolled/have a place
- No, I have already completed my credential or I am a registered (with AHPRA) Podiatric Surgeon
- No

2. What year do you expect to begin?

- Not sure
- Year

3. Which of the following training courses have you considered, applied for, enrolled in or waiting to commence?

- Podiatric Surgery
- Paediatric Credential through the Australian Podiatry Council
- Sport Podiatry Credential through the Australian Podiatry Council
- High Risk Foot Credential through the Australian Podiatry Council

4. What is the likelihood that you will:

|                                                                                               | Very unlikely         | Unlikely              | Neutral               | Likely                | Very likely           | Not relevant as I only work in podiatry management or administration | Not relevant as I only work in podiatry academia | Not relevant as I have already left or never commenced a podiatry role |
|-----------------------------------------------------------------------------------------------|-----------------------|-----------------------|-----------------------|-----------------------|-----------------------|----------------------------------------------------------------------|--------------------------------------------------|------------------------------------------------------------------------|
| Leave direct patient care (private practice, community health or hospital) within FIVE YEARS? | <input type="radio"/> | <input type="radio"/> | <input type="radio"/> | <input type="radio"/> | <input type="radio"/> | <input type="radio"/>                                                | <input type="radio"/>                            | <input type="radio"/>                                                  |
| Leave podiatry work entirely within FIVE YEARS?                                               | <input type="radio"/> | <input type="radio"/> | <input type="radio"/> | <input type="radio"/> | <input type="radio"/> | <input type="radio"/>                                                | <input type="radio"/>                            | <input type="radio"/>                                                  |

**C) About your work places**

1. How many locations do you practice at?

2. When did you start working at your main workplace? (month and year)

Month

Year

3. What is the suburb and postcode of your main podiatry workplace

Suburb

Postcode

4. How long have you been working in or close to this geographic location?

Months

Years

5. How many podiatrists work in your current main workplace? (Include yourself if applicable)

|                                   | Number               |
|-----------------------------------|----------------------|
| Female                            | <input type="text"/> |
| Males                             | <input type="text"/> |
| Unsure (place 0 in number column) | <input type="text"/> |

6. What is your business relationship with your main workplace?

- Owner or partner
- Salaried employee (e.g. receive fixed annual salary and benefits with tax deducted)
- Contracted employee (e.g. receive fixed payment for specified time or a % of billings before tax)
- Locum
- Other

7. Please nominate which of the following is the best fit for you primary workplace

- Private setting with other health workers or professionals (including podiatry assistants)
- Public funded setting with other health workers or professionals
- Private setting with podiatrists only (excluding podiatry assistants)

8. How many other health workers or professionals are employed at your current main workplace? (Please enter all that apply)

|                                                                     | Number               |
|---------------------------------------------------------------------|----------------------|
| Other allied health professionals                                   | <input type="text"/> |
| Podiatry assistants                                                 | <input type="text"/> |
| Medical staff (GP and/or specialists)                               | <input type="text"/> |
| Nurses                                                              | <input type="text"/> |
| Other (please list the worker and how many)<br><input type="text"/> | <input type="text"/> |

9. My opportunities for continuing podiatry education and professional development are:

- Very limited
- Average
- Very good

10. What type of leave do you have access to as part of your employment arrangements (Select all that apply)

- Paid annual leave
- Unpaid annual leave
- Paid sick leave
- No leave available

11. How much leave have you taken in the past 12 months for recreational purposes? (Where you have taken paid and unpaid leave, please select both)

|                                    | Weeks                |
|------------------------------------|----------------------|
| Weeks of paid recreational leave   | <input type="text"/> |
| Weeks of unpaid recreational leave | <input type="text"/> |

12. In your most recent USUAL week at work, for approximately how many HOURS did you undertake work in each of the following settings? (Include ALL of the work you do as a podiatrist)

|                                                                                      | Hours                |
|--------------------------------------------------------------------------------------|----------------------|
| Private practice hours                                                               | <input type="text"/> |
| Community health centre or other state-run primary care organisation hours           | <input type="text"/> |
| Public hospital hours                                                                | <input type="text"/> |
| Private hospital hours                                                               | <input type="text"/> |
| Residential/aged care health facility (nursing/residential home, hospice etc.) hours | <input type="text"/> |
| Tertiary education institution hours                                                 | <input type="text"/> |
| Other (please list setting and number of hours)<br><input type="text"/>              | <input type="text"/> |

13. In question 9, you reported how many HOURS you worked in your MOST RECENT USUAL WEEK. Using this as your total, please break down how you spent these hours on the following activities? (Include ALL of the work you do as a podiatrist in ALL jobs/workplaces)

|                                                                                                                                           | Hours                |
|-------------------------------------------------------------------------------------------------------------------------------------------|----------------------|
| Direct patient care hours (face-to-face, phone consultations, home visits, including any patient care with a student you are supervising) | <input type="text"/> |
| Indirect patient care hours (patient notes, reports, phone calls, care planning meetings)                                                 | <input type="text"/> |
| Education activity hours (teaching, research, continuing education)                                                                       | <input type="text"/> |
| Practice management hours (including supervision of staff, ordering stock, advertising etc)                                               | <input type="text"/> |
| Other (please report what and how many hours)                                                                                             | <input type="text"/> |

14. For how many years did you live in a rural area up until the age you left secondary school?

0 years, did not live rurally

Years

14a. Please indicate the town name and state of the main rural area where you lived up until school leaving age.

Town

State

**D) About your workload**

Has your workload changed since completing survey one?

Yes

No

**D) About your workload**

1. In your most recent USUAL week at work, for around HOW MANY patients did you provide care? (Include new and existing patients in ALL SETTINGS—eg. hospital and private practice—procedures and telephone consultations for day time and out of hours)

|                                              | Number               |
|----------------------------------------------|----------------------|
| Private practice                             | <input type="text"/> |
| Hospital/community health                    | <input type="text"/> |
| Home visit/ Residential Aged Care facilities | <input type="text"/> |

2. Excluding emergencies or urgent needs, for how many days does a patient typically have to wait for an appointment with you or a podiatrist in your workplace:

Less than 3 work days

4-7 work days

7-14 work days

Greater than 15 workdays

3. For patients who attend with a Medicare chronic disease management plan, do you usually bulk bill?

- Yes
- No
- My workplace doesn't accept Medicare chronic disease management plans

4. What percentage of your usual working week involves home visits where care is provided in a person's home or residential aged care facility?

- <50%
- 50-99%
- 100%

5. How long does your average consultation last?

- <10 minutes
- 11-15 minutes
- 16-20 minutes
- 21-30 minutes
- >31 minutes

**E) About your geographic location**

Have you moved house/unit since completing survey one?

- Yes
- No

**E) About your geographic location**

1. What is the suburb and postcode where you live?

Suburb

Postcode

2. The opportunities for social interaction for you and your family in the geographic location of your main workplace are:

- Very limited
- Average
- Very good

3. Please indicate the degree to which you agree or disagree with the following statements.

|                                                                                   | Strongly agree        | Agree                 | Neither agree nor disagree | Disagree              | Strongly disagree     | Not Applicable        |
|-----------------------------------------------------------------------------------|-----------------------|-----------------------|----------------------------|-----------------------|-----------------------|-----------------------|
| I don't have many friends or family members in my current work location           | <input type="radio"/> | <input type="radio"/> | <input type="radio"/>      | <input type="radio"/> | <input type="radio"/> | <input type="radio"/> |
| It is easy to pursue my hobbies and leisure interests in my current work location | <input type="radio"/> | <input type="radio"/> | <input type="radio"/>      | <input type="radio"/> | <input type="radio"/> | <input type="radio"/> |
| My partner does not have many friends or family members in this work location     | <input type="radio"/> | <input type="radio"/> | <input type="radio"/>      | <input type="radio"/> | <input type="radio"/> | <input type="radio"/> |
| There are good employment opportunities for my partner in this work location      | <input type="radio"/> | <input type="radio"/> | <input type="radio"/>      | <input type="radio"/> | <input type="radio"/> | <input type="radio"/> |

|                                                                          | Strongly agree        | Agree                 | Neither agree nor disagree | Disagree              | Strongly disagree     | Not Applicable        |
|--------------------------------------------------------------------------|-----------------------|-----------------------|----------------------------|-----------------------|-----------------------|-----------------------|
| The choice of schools for our children is adequate in this work location | <input type="radio"/> | <input type="radio"/> | <input type="radio"/>      | <input type="radio"/> | <input type="radio"/> | <input type="radio"/> |

## F) About you

1. Year of Birth (Full year: i.e. 1980 not 80)

2. Gender

- Male
- Female
- Intersex
- Prefer not to answer

3. In what year did you complete your podiatry degree? (Full year: i.e. 1980 not 80)

4. In which country did you complete your podiatry degree?

- Australia
- New Zealand
- United Kingdom
- Other, please list

5. Where did you complete your podiatry training?

- La Trobe University, Bundoora
- La Trobe University, Bendigo
- Western Sydney University
- Queensland University of Technology
- University of Newcastle
- Charles Sturt University, Albury-Wodonga
- Other

6. Did you complete any rural or regional placements?

- Yes, Where?

- No

7. In general, would you say your health is:

- Excellent
- Very Good
- Good
- Fair
- Poor



### Part B- Psychological Distress

We are interested in understanding some of the aspects about your health that may impact your work. Part B will focus on measuring impacts of distress, resilience and burnout.

Please note all data collected in Part B is confidential and you will not be asked to give any identifying information in a way that your results can be matched to you.

If any of the follow questions make you feel uncomfortable you can close the survey window. If you need further help, please call Life Line: 13 11 14 or see your general practitioner.

#### 1. Brief Resilience Scale

|                                                             | Strongly Disagree     | Disagree              | Neutral               | Agree                 | Strongly Agree        |
|-------------------------------------------------------------|-----------------------|-----------------------|-----------------------|-----------------------|-----------------------|
| I tend to bounce back quickly after hard times              | <input type="radio"/> | <input type="radio"/> | <input type="radio"/> | <input type="radio"/> | <input type="radio"/> |
| I have a hard time making it through stressful events       | <input type="radio"/> | <input type="radio"/> | <input type="radio"/> | <input type="radio"/> | <input type="radio"/> |
| It does not take me long to recover from a stressful event  | <input type="radio"/> | <input type="radio"/> | <input type="radio"/> | <input type="radio"/> | <input type="radio"/> |
| It is hard for me to snap back when something bad happens   | <input type="radio"/> | <input type="radio"/> | <input type="radio"/> | <input type="radio"/> | <input type="radio"/> |
| I usually come through difficult times with little trouble  | <input type="radio"/> | <input type="radio"/> | <input type="radio"/> | <input type="radio"/> | <input type="radio"/> |
| I tend to take a long time to get over set-backs in my life | <input type="radio"/> | <input type="radio"/> | <input type="radio"/> | <input type="radio"/> | <input type="radio"/> |

2. Allied Health professionals frequently have staff-client interaction that are based primarily around the client's current problems (psychological, social or physical). Solutions to the client's issues may not always be obvious. Sometimes the chronic stress of working with these individuals can be emotionally draining and lead to burnout.

The Maslach Burnout Inventory is a tool used to assess Burnout. Please answer the following statements;

|                                                                                      | Everyday              | A few times a week    | Once a week           | A few times a month   | Once a month or less  | A few times a year    | Never                 |
|--------------------------------------------------------------------------------------|-----------------------|-----------------------|-----------------------|-----------------------|-----------------------|-----------------------|-----------------------|
| I deal very effectively with the problems of my patients                             | <input type="radio"/> | <input type="radio"/> | <input type="radio"/> | <input type="radio"/> | <input type="radio"/> | <input type="radio"/> | <input type="radio"/> |
| I feel I treat some patients as if they were impersonal objects                      | <input type="radio"/> | <input type="radio"/> | <input type="radio"/> | <input type="radio"/> | <input type="radio"/> | <input type="radio"/> | <input type="radio"/> |
| I feel emotionally drained from my work                                              | <input type="radio"/> | <input type="radio"/> | <input type="radio"/> | <input type="radio"/> | <input type="radio"/> | <input type="radio"/> | <input type="radio"/> |
| I feel fatigued when I get up in the morning and have to face another day on the job | <input type="radio"/> | <input type="radio"/> | <input type="radio"/> | <input type="radio"/> | <input type="radio"/> | <input type="radio"/> | <input type="radio"/> |
| I've become more callous towards people since I took this job                        | <input type="radio"/> | <input type="radio"/> | <input type="radio"/> | <input type="radio"/> | <input type="radio"/> | <input type="radio"/> | <input type="radio"/> |
| I feel I'm positively influencing other people's lives through my work               | <input type="radio"/> | <input type="radio"/> | <input type="radio"/> | <input type="radio"/> | <input type="radio"/> | <input type="radio"/> | <input type="radio"/> |
| Working with people all day is really a strain for me                                | <input type="radio"/> | <input type="radio"/> | <input type="radio"/> | <input type="radio"/> | <input type="radio"/> | <input type="radio"/> | <input type="radio"/> |
| I don't really care what happens to some patients                                    | <input type="radio"/> | <input type="radio"/> | <input type="radio"/> | <input type="radio"/> | <input type="radio"/> | <input type="radio"/> | <input type="radio"/> |
| I feel exhilarated after working closely with my patients                            | <input type="radio"/> | <input type="radio"/> | <input type="radio"/> | <input type="radio"/> | <input type="radio"/> | <input type="radio"/> | <input type="radio"/> |
| I think of giving up podiatry for another career                                     | <input type="radio"/> | <input type="radio"/> | <input type="radio"/> | <input type="radio"/> | <input type="radio"/> | <input type="radio"/> | <input type="radio"/> |
| I reflect on the satisfaction I get from being a podiatrist                          | <input type="radio"/> | <input type="radio"/> | <input type="radio"/> | <input type="radio"/> | <input type="radio"/> | <input type="radio"/> | <input type="radio"/> |
| I regret my decision to become a podiatrist                                          | <input type="radio"/> | <input type="radio"/> | <input type="radio"/> | <input type="radio"/> | <input type="radio"/> | <input type="radio"/> | <input type="radio"/> |

#### 3. The Ten-Item Personality Inventory (TIPI)

I see myself as:

|                              | Disagree strongly     | Disagree moderately   | Disagree a little     | Neither agree nor disagree | Agree a little        | Agree moderately      | Agree strongly        |
|------------------------------|-----------------------|-----------------------|-----------------------|----------------------------|-----------------------|-----------------------|-----------------------|
| 1. Extraverted, enthusiastic | <input type="radio"/> | <input type="radio"/> | <input type="radio"/> | <input type="radio"/>      | <input type="radio"/> | <input type="radio"/> | <input type="radio"/> |

|                                     | Disagree strongly     | Disagree moderately   | Disagree a little     | Neither agree nor disagree | Agree a little        | Agree moderately      | Agree strongly        |
|-------------------------------------|-----------------------|-----------------------|-----------------------|----------------------------|-----------------------|-----------------------|-----------------------|
| 2. Critical, quarrelsome            | <input type="radio"/> | <input type="radio"/> | <input type="radio"/> | <input type="radio"/>      | <input type="radio"/> | <input type="radio"/> | <input type="radio"/> |
| 3. Dependable, self-disciplined     | <input type="radio"/> | <input type="radio"/> | <input type="radio"/> | <input type="radio"/>      | <input type="radio"/> | <input type="radio"/> | <input type="radio"/> |
| 4. Anxious, easily upset            | <input type="radio"/> | <input type="radio"/> | <input type="radio"/> | <input type="radio"/>      | <input type="radio"/> | <input type="radio"/> | <input type="radio"/> |
| 5. Open to new experiences, complex | <input type="radio"/> | <input type="radio"/> | <input type="radio"/> | <input type="radio"/>      | <input type="radio"/> | <input type="radio"/> | <input type="radio"/> |
| 6. Reserved, quiet                  | <input type="radio"/> | <input type="radio"/> | <input type="radio"/> | <input type="radio"/>      | <input type="radio"/> | <input type="radio"/> | <input type="radio"/> |
| 7. Sympathetic, warm                | <input type="radio"/> | <input type="radio"/> | <input type="radio"/> | <input type="radio"/>      | <input type="radio"/> | <input type="radio"/> | <input type="radio"/> |
| 8. Disorganised, careless           | <input type="radio"/> | <input type="radio"/> | <input type="radio"/> | <input type="radio"/>      | <input type="radio"/> | <input type="radio"/> | <input type="radio"/> |
| 9. Calm, emotionally stable         | <input type="radio"/> | <input type="radio"/> | <input type="radio"/> | <input type="radio"/>      | <input type="radio"/> | <input type="radio"/> | <input type="radio"/> |
| 10. Conventional, uncreative        | <input type="radio"/> | <input type="radio"/> | <input type="radio"/> | <input type="radio"/>      | <input type="radio"/> | <input type="radio"/> | <input type="radio"/> |

4. The personal life events listed below can have an important influence on person's work-life balance.

For each statement below, please indicate 'YES' or 'NO' as to whether you experienced the event during the past 12 months. For each statement you answer 'YES', please indicate how long ago the event occurred or commenced.

|                                                                         | No                       | Yes                      | 0-3 months ago           | 4 to 6 months ago        | 7 to 9 months ago        | 10 to 12 months ago      |
|-------------------------------------------------------------------------|--------------------------|--------------------------|--------------------------|--------------------------|--------------------------|--------------------------|
| Serious personal injury or illness to self                              | <input type="checkbox"/> | <input type="checkbox"/> | <input type="checkbox"/> | <input type="checkbox"/> | <input type="checkbox"/> | <input type="checkbox"/> |
| Serious personal injury or illness to a close relative or family member | <input type="checkbox"/> | <input type="checkbox"/> | <input type="checkbox"/> | <input type="checkbox"/> | <input type="checkbox"/> | <input type="checkbox"/> |
| Death of spouse or child                                                | <input type="checkbox"/> | <input type="checkbox"/> | <input type="checkbox"/> | <input type="checkbox"/> | <input type="checkbox"/> | <input type="checkbox"/> |
| Death of other close relative or family member (e.g parent or sibling)  | <input type="checkbox"/> | <input type="checkbox"/> | <input type="checkbox"/> | <input type="checkbox"/> | <input type="checkbox"/> | <input type="checkbox"/> |
| Death of a close friend                                                 | <input type="checkbox"/> | <input type="checkbox"/> | <input type="checkbox"/> | <input type="checkbox"/> | <input type="checkbox"/> | <input type="checkbox"/> |
| Victim of physical violence (e.g assault)                               | <input type="checkbox"/> | <input type="checkbox"/> | <input type="checkbox"/> | <input type="checkbox"/> | <input type="checkbox"/> | <input type="checkbox"/> |
| Victim of property crime (e.g theft, housebreaking)                     | <input type="checkbox"/> | <input type="checkbox"/> | <input type="checkbox"/> | <input type="checkbox"/> | <input type="checkbox"/> | <input type="checkbox"/> |
| Named as defendant in a medical negligence claim                        | <input type="checkbox"/> | <input type="checkbox"/> | <input type="checkbox"/> | <input type="checkbox"/> | <input type="checkbox"/> | <input type="checkbox"/> |

5. This question asks about everyday risk-taking in relation to different types of activities.

How likely are you to engage in each of the following activities?

|                                                                                                       | 1. Very unlikely      | 2. Unlikely           | 3. Neutral            | 4. Likely             | 5. Very likely        |
|-------------------------------------------------------------------------------------------------------|-----------------------|-----------------------|-----------------------|-----------------------|-----------------------|
| Financial risks (e.g investments with an uncertain outcome)                                           | <input type="radio"/> | <input type="radio"/> | <input type="radio"/> | <input type="radio"/> | <input type="radio"/> |
| Career and professional risks (e.g. publicly challenging your professional colleagues)                | <input type="radio"/> | <input type="radio"/> | <input type="radio"/> | <input type="radio"/> | <input type="radio"/> |
| Clinical risks (e.g recommending a treatment which is new to your usual practice or is controversial) | <input type="radio"/> | <input type="radio"/> | <input type="radio"/> | <input type="radio"/> | <input type="radio"/> |

6. These questions concern how you have been feeling over the past 30 days. Tick a box below each question that best represents how you have been.

|                                                                                                    | 1. None of the time   | 2. A little of the time | 3. Some of the time   | 4. Most of the time   | 5. All of the time    |
|----------------------------------------------------------------------------------------------------|-----------------------|-------------------------|-----------------------|-----------------------|-----------------------|
| During the last 30 days, about how often did you feel tired out for no good reason?                | <input type="radio"/> | <input type="radio"/>   | <input type="radio"/> | <input type="radio"/> | <input type="radio"/> |
| During the last 30 days, about how often did you feel nervous?                                     | <input type="radio"/> | <input type="radio"/>   | <input type="radio"/> | <input type="radio"/> | <input type="radio"/> |
| During the last 30 days, about how often did you feel so nervous that nothing could calm you down? | <input type="radio"/> | <input type="radio"/>   | <input type="radio"/> | <input type="radio"/> | <input type="radio"/> |
| During the last 30 days, about how often did you feel hopeless?                                    | <input type="radio"/> | <input type="radio"/>   | <input type="radio"/> | <input type="radio"/> | <input type="radio"/> |
| During the last 30 days, about how often did you feel restless or fidgety?                         | <input type="radio"/> | <input type="radio"/>   | <input type="radio"/> | <input type="radio"/> | <input type="radio"/> |

|                                                                                               | 1. None of the time   | 2. A little of the time | 3. Some of the time   | 4. Most of the time   | 5. All of the time    |
|-----------------------------------------------------------------------------------------------|-----------------------|-------------------------|-----------------------|-----------------------|-----------------------|
| During the last 30 days, about how often did you feel so restless you could not sit still?    | <input type="radio"/> | <input type="radio"/>   | <input type="radio"/> | <input type="radio"/> | <input type="radio"/> |
| During the last 30 days, about how often did you feel depressed?                              | <input type="radio"/> | <input type="radio"/>   | <input type="radio"/> | <input type="radio"/> | <input type="radio"/> |
| During the last 30 days, about how often did you feel that everything was an effort?          | <input type="radio"/> | <input type="radio"/>   | <input type="radio"/> | <input type="radio"/> | <input type="radio"/> |
| During the last 30 days, about how often did you feel so sad that nothing could cheer you up? | <input type="radio"/> | <input type="radio"/>   | <input type="radio"/> | <input type="radio"/> | <input type="radio"/> |
| During the last 30 days, about how often did you feel worthless?                              | <input type="radio"/> | <input type="radio"/>   | <input type="radio"/> | <input type="radio"/> | <input type="radio"/> |

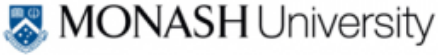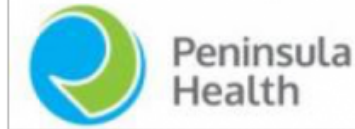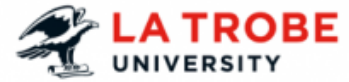

### Block 1
