# Supplementary material for: Describing the factors related to rural podiatry work and retention in the podiatry workforce: a national survey
Source: Springer Nature journal article supplement (doi:10.1186/s13047-023-00603-5), 2023-01-01
Supplement: MOESM4 [file 24003148]

  


Describing the factors related to rural podiatry work and retention in the podiatry workforce: a national survey | mijn-bsl


Describing the factors related to rural podiatry work and retention in the podiatry workforce: a national survey | mijn-bsl
Skip to main content

Menu

Mijn bibliotheek

Shop

Chevron down icon


Chevron up icon

Nieuws


Boeken


Tijdschriften


E-learning


Web-tv


 Video


Audio

Tips voor Mijn BSL

Bohn Stafleu van Loghum

Zoeken

Search icon

UITGEBREID ZOEKEN

Inloggen

### Bohn Stafleu van Loghum

JAVASCRIPT ACTIVEREN

U moet JavaScript in uw browser activeren om alle functionaliteiten van deze website te kunnen gebruiken.

INTERNET EXPLORER WORDT NIET LANGER ONDERSTEUND

Uw versie van Internet Explorer wordt niet langer ondersteund door dit systeem. Installeer een van de volgende browsers: Microsoft Edge, Safari, Chrome of Firefox

Top

Journal of Foot and Ankle Research

Gepubliceerd in:

Open Access
01-12-2023 | Research

# Describing the factors related to rural podiatry work and retention in the podiatry workforce: a national survey

Gepubliceerd in:
Journal of Foot and Ankle Research 
|
Uitgave 1/2023

share

DELEN

## Deel dit onderdeel of sectie (kopieer de link)

- Optie A:

  Klik op de rechtermuisknop op de link en selecteer de optie “linkadres kopiëren”
- Optie B:

  Deel de link per e-mail

  Link delen

publish

Publiceer nu

Zoek in dit artikel
close

0  /  0

0

Vorige

Volgende

insite

ZOEKEN

vorige artikel

Stress reduction interventions for patients with chronic diabetic foot ulcers: a qualitative study into patients and caregivers’ perceptions

volgende artikel

The effect of dextrose prolotherapy versus placebo/other non-surgical treatments on pain in chronic plantar fasciitis: a systematic review and meta-analysis of clinical trials

share

DELEN

## Deel dit onderdeel of sectie (kopieer de link)

- Optie A:

  Klik op de rechtermuisknop op de link en selecteer de optie “linkadres kopiëren”
- Optie B:

  Deel de link per e-mail

  Link delen

publish

Publiceer nu

## Onze productaanbevelingen

### BSL Podotherapeut Totaal

Binnen de bundel kunt u gebruik maken van boeken, tijdschriften, e-learnings, web-tv's en uitlegvideo's. BSL Podotherapeut Totaal is overal toegankelijk; via uw PC, tablet of smartphone.

Meer informatie

Metagegevens

Titel
:   Describing the factors related to rural podiatry work and retention in the podiatry workforce: a national survey

Publicatiedatum
:   01-12-2023

Gepubliceerd in
:   Journal of Foot and Ankle Research 
    / Uitgave 1/2023
      
    Elektronisch ISSN: 1757-1146

DOI
:   https://doi.org/10.1186/s13047-023-00603-5

### Andere artikelen Uitgave 1/2023


Naar de uitgave

Review

### The financial burden of diabetes-related foot disease in Australia: a systematic review

Research

### Can the F-Scan in-shoe pressure system be combined with the GAITRite® temporal and spatial parameter-recording walkway as a cost-effective alternative in clinical gait analysis? A validation study

Research

### Is the diagnostic validity of conventional radiography for Lisfranc injury acceptable?

Research

### Development of the consensus-based recommendations for Podiatry care of Neuropathy In Cancer Survivors (PodNICS): a Delphi consensus study of Australian podiatrists

Research

### Health Literacy predicts incident foot ulcers after 4 years – the SHELLED cohort study

Review

### Developing a diagnostic framework for patients presenting with Exercise Induced Leg Pain (EILP): a scoping review

- Mijn bibliotheek
- Shop
  - Nieuws
  - Boeken
  - Tijdschriften
  - E-learning
  - Web-tv
  - Video
  - Audio
- Tips voor Mijn BSL

Bohn Stafleu van Loghum - Uitgeverij voor de gezondheidszorg

#### Over ons

Contact


Cookies


Algemene voorwaarden


Privacy statement


Disclaimer


Cookies beheren

Springer Nature Logo

© Bohn Stafleu van Loghum

Version: 0.3578.0
