# Supplementary material for: Describing the factors related to rural podiatry work and retention in the podiatry workforce: a national survey
Source: Springer Nature journal article supplement (doi:10.1186/s13047-023-00603-5), 2023-01-01
Supplement: MOESM4 [file 24003148]

## Default Question Block

### PAIGE

#### Podiatrists in Australia - Investigating Graduate Employment.

---

There are many factors which podiatrists consider when choosing where to work. Additionally, many health professionals are confronted with burnout and their own mental health challenges. We are interested in determining how these factors apply to you and your situation.

This is the 4th survey of the PAIGE study. Surveys 1 and 2 were conducted just in Victoria and now we are expanding for a second year to the whole of Australia.

We strongly encourage you to repeat this survey even if you completed it in 2019 to capture any changes in your work practices.

You are invited to take part in this research if you are a podiatrist working in Australia. We are interested in EVERY podiatrist working in Australia being part of this study. Your responses are essential for this research to achieve it's aims.

Detailed information about these factors are essential for future workforce planning in the podiatry profession. This study is similar to others underway in medicine and nursing. Exploration of these factors has not been undertaken in this detail for allied health, and particularly not in the podiatry profession.

The information that you provide in the PAIGE study will be used to:

- Understand how life impacts on workplace decisions
- Improve the access to podiatry services for every Australian, particularly in rural and regional areas
- Improve the evidence base informing podiatry workforce policy

This research is being undertaken by researchers at Monash University (A/Prof Cylie Williams, Anna Couch, Dr Belinda O'Sullivan, and Prof Terry Haines) and La Trobe University (Prof Hylton Menz).

---

It is not expected that you will directly benefit from this research and there is no payment for being part of this research.

**At the end of the survey you may choose to enter a draw to win:**

**- One (1) of ten (10) \$100 vouchers for Continued Professional Development sessions or conferences delivered by the Australian Podiatry Association. You do not have to be a member of the APODA to use.**

If you choose to leave your contact details to receive results, you can be assured that your contact details will not be subsequently linked to your survey responses. You will see this by the survey window opening up a new survey.

This survey will take up to 30 minutes depending on if you have completed it before. You can complete it in your own time and it is important that the whole survey is completed.

You can withdraw at any time by closing your Internet browser window. Being part of this study is voluntary. However, if you do consent and answer questions, anything you have answered may be used within the research. You will not be able to withdraw the answers to any questions you have answered.

This study has been partially funded by the Australian Podiatry Association to support a research worker, and researchers on the team are supported by fellowships and a stipend through the National Health and Medical Research Council and the Australian Government Research Training Program.

---

The results of this survey are confidential. You will not be asked to give any identifying information in a way that your results can be matched to you. Answers are being collected through Qualtrics and you can access the privacy policy here: <https://www.qualtrics.com/privacy-statement/>

Any provided information and details (in separate survey) will only be viewed by the research team. The collected responses will be stored in accordance with Australian Privacy Regulations, and will be kept as a password protected data file stored on a cloud based server for 15 years. If there is future funding of this project, your responses to this survey may be linked to your responses in future surveys. A report of this study will be submitted for publication. No individual responses will be identified in any publications.

A newsletter containing key survey results and information about how results are being used to advance the podiatry profession will be produced during this project and shared with participants and funder. You have the option to provide your email address to receive this at the end of the survey. It will not be linked with your survey responses.

---

If you would like to contact the research team about aspects of this study or have a complaint concerning the manner in which this research is being conducted, please contact the principal investigator:

Cylie Williams: [cylie.williams@monash.edu](mailto:cylie.williams@monash.edu)  
Ph: (03) 9784 2678

OR

Should you have any concerns or complaints about the conduct of the project, you are welcome to contact:  
 Executive Officer, Monash University Human Research Ethics (MUHREC) Room 111, Chancellery Building E, 24 Sports Walk, Clayton Campus Research Office, Monash University Tel: +61 3 9905 2052 Email: [muhrec@monash.edu](mailto:muhrec@monash.edu) Fax: +61 3 9905 3831

If you completed the 1st, 2nd or 3rd survey in 2017, 2018 or 2019 please enter the same code that you created in survey one.

If this is the first PAIGE survey you have complete and to consent to being part of this research, please create your code to enable your answers to be linked during subsequent rounds.

**To create this code, please use:**  
 - **Your two (2) initials and two (2) digits of the date in the month of your birthday.**

e.g. Cylie Williams and birthday date in the month is 28, the code example is CW28

If you have a double surname (e.g. Smith-Peterson), only the first initial - S should be used as the code should be only 4 digits.

1. Have you completed the Round 3 PAIGE survey

- Yes
- No
- Can't remember

2. Are you in the same job since the beginning of 2019?

- Yes
- No

**A) About your job satisfaction**

1. Please indicate how satisfied or dissatisfied you are with each of the various aspects of your job

|                                                                       | Very dissatisfied     | Moderately dissatisfied | Neither satisfied or dissatisfied | Moderately satisfied  | Very satisfied        | Not applicable        |
|-----------------------------------------------------------------------|-----------------------|-------------------------|-----------------------------------|-----------------------|-----------------------|-----------------------|
| Freedom to choose your own method of working                          | <input type="radio"/> | <input type="radio"/>   | <input type="radio"/>             | <input type="radio"/> | <input type="radio"/> | <input type="radio"/> |
| Amount of variety in your work                                        | <input type="radio"/> | <input type="radio"/>   | <input type="radio"/>             | <input type="radio"/> | <input type="radio"/> | <input type="radio"/> |
| Physical working conditions                                           | <input type="radio"/> | <input type="radio"/>   | <input type="radio"/>             | <input type="radio"/> | <input type="radio"/> | <input type="radio"/> |
| Opportunities to use your abilities                                   | <input type="radio"/> | <input type="radio"/>   | <input type="radio"/>             | <input type="radio"/> | <input type="radio"/> | <input type="radio"/> |
| Your colleagues and fellow workers                                    | <input type="radio"/> | <input type="radio"/>   | <input type="radio"/>             | <input type="radio"/> | <input type="radio"/> | <input type="radio"/> |
| Recognition you get for good work                                     | <input type="radio"/> | <input type="radio"/>   | <input type="radio"/>             | <input type="radio"/> | <input type="radio"/> | <input type="radio"/> |
| Your hours of work                                                    | <input type="radio"/> | <input type="radio"/>   | <input type="radio"/>             | <input type="radio"/> | <input type="radio"/> | <input type="radio"/> |
| Your remuneration                                                     | <input type="radio"/> | <input type="radio"/>   | <input type="radio"/>             | <input type="radio"/> | <input type="radio"/> | <input type="radio"/> |
| Amount of responsibility you are given                                | <input type="radio"/> | <input type="radio"/>   | <input type="radio"/>             | <input type="radio"/> | <input type="radio"/> | <input type="radio"/> |
| Taking everything into consideration, how do you feel about your job? | <input type="radio"/> | <input type="radio"/>   | <input type="radio"/>             | <input type="radio"/> | <input type="radio"/> | <input type="radio"/> |

2. Please indicate the degree to which you agree or disagree with the following statements

|                                                                             | Strongly disagree     | Disagree              | Neutral               | Agree                 | Strongly Agree        | Not applicable        |
|-----------------------------------------------------------------------------|-----------------------|-----------------------|-----------------------|-----------------------|-----------------------|-----------------------|
| The balance between my personal and professional commitments is about right | <input type="radio"/> | <input type="radio"/> | <input type="radio"/> | <input type="radio"/> | <input type="radio"/> | <input type="radio"/> |

|                                                                                                                         | Strongly disagree     | Disagree              | Neutral               | Agree                 | Strongly Agree        | Not applicable        |
|-------------------------------------------------------------------------------------------------------------------------|-----------------------|-----------------------|-----------------------|-----------------------|-----------------------|-----------------------|
| I have a poor support network of other podiatrists like me                                                              | <input type="radio"/> | <input type="radio"/> | <input type="radio"/> | <input type="radio"/> | <input type="radio"/> | <input type="radio"/> |
| It is difficult to take time off when I want to                                                                         | <input type="radio"/> | <input type="radio"/> | <input type="radio"/> | <input type="radio"/> | <input type="radio"/> | <input type="radio"/> |
| I can take time off at short notice, for example if one of my children is ill or for a home emergency                   | <input type="radio"/> | <input type="radio"/> | <input type="radio"/> | <input type="radio"/> | <input type="radio"/> | <input type="radio"/> |
| My patients have unrealistic expectations about how I can help them                                                     | <input type="radio"/> | <input type="radio"/> | <input type="radio"/> | <input type="radio"/> | <input type="radio"/> | <input type="radio"/> |
| The majority of my patients have complex health and social problems                                                     | <input type="radio"/> | <input type="radio"/> | <input type="radio"/> | <input type="radio"/> | <input type="radio"/> | <input type="radio"/> |
| I have good support and supervision from podiatrists with advanced skills (ie: Sports, Paediatrics, High Risk, Surgery) | <input type="radio"/> | <input type="radio"/> | <input type="radio"/> | <input type="radio"/> | <input type="radio"/> | <input type="radio"/> |
| The hours I work are unpredictable                                                                                      | <input type="radio"/> | <input type="radio"/> | <input type="radio"/> | <input type="radio"/> | <input type="radio"/> | <input type="radio"/> |
| Running my practice is stressful most of the time                                                                       | <input type="radio"/> | <input type="radio"/> | <input type="radio"/> | <input type="radio"/> | <input type="radio"/> | <input type="radio"/> |
| I often undertake tasks that somebody less qualified could do                                                           | <input type="radio"/> | <input type="radio"/> | <input type="radio"/> | <input type="radio"/> | <input type="radio"/> | <input type="radio"/> |
| I cannot work my preferred hours due to a lack of jobs offering those hours                                             | <input type="radio"/> | <input type="radio"/> | <input type="radio"/> | <input type="radio"/> | <input type="radio"/> | <input type="radio"/> |

3. Would you like to change your hours of work?

- No
- Yes, I'd like to increase my hours
- Yes, I'd like to decrease my hours

**B) About your career development**

4. Do you plan to apply for Australian Podiatry Council Career Framework in Paediatric, Sports or High Risk Foot or to the Australasian College of Podiatric Surgeons (ACPS)?

- Yes
- Unsure
- No, I'm already enrolled/have a place
- No, I have already completed my credential or I am a registered (with AHPRA) Podiatric Surgeon
- No

2. What year do you expect to begin?

- Not sure
- Year

3. Which of the following training courses have you considered, applied for, enrolled in or waiting to commence?

- Podiatric Surgery
- Paediatric Credential through the Australian Podiatry Association
- Sport Podiatry Credential through the Australian Podiatry Association
- High Risk Foot Credential through the Australian Podiatry Association

4. What is the likelihood that you will:

|                                                                                               | Very unlikely         | Unlikely              | Neutral               | Likely                | Very likely           | Not relevant as I only work in podiatry management or administration | Not relevant as I only work in podiatry academia | Not relevant as I have already left or never commenced a podiatry role |
|-----------------------------------------------------------------------------------------------|-----------------------|-----------------------|-----------------------|-----------------------|-----------------------|----------------------------------------------------------------------|--------------------------------------------------|------------------------------------------------------------------------|
| Leave direct patient care (private practice, community health or hospital) within FIVE YEARS? | <input type="radio"/> | <input type="radio"/> | <input type="radio"/> | <input type="radio"/> | <input type="radio"/> | <input type="radio"/>                                                | <input type="radio"/>                            | <input type="radio"/>                                                  |
| Leave podiatry work entirely within FIVE YEARS?                                               | <input type="radio"/> | <input type="radio"/> | <input type="radio"/> | <input type="radio"/> | <input type="radio"/> | <input type="radio"/>                                                | <input type="radio"/>                            | <input type="radio"/>                                                  |

**C) About your work places**

1. How many locations do you practice at?

2. When did you start working at your main workplace? (month and year)

Month

Year

3. What is the suburb and postcode of your main podiatry workplace

Suburb

Postcode

4. How long have you been working in or close to this geographic location?

Months

Years

5. How many podiatrists work in your current main workplace? (Include yourself if applicable)

|                                   | Number               |
|-----------------------------------|----------------------|
| Female                            | <input type="text"/> |
| Males                             | <input type="text"/> |
| Unsure (place 0 in number column) | <input type="text"/> |

6. What is your business relationship with your main workplace?

- Owner or partner
- Salaried employee (e.g. receive fixed annual salary and benefits with tax deducted)
- Contracted employee (e.g. receive fixed payment for specified time or a % of billings before tax)
- Locum
- Other

7. Please nominate which of the following is the best fit for your primary workplace

- Private setting with other health workers or professionals (including podiatry assistants)
- Public funded setting with other health workers or professionals
- Private setting with podiatrists only (excluding podiatry assistants)
- University (with or without a teaching clinical load)
- Business (no patients)

8. How many other health workers or professionals are employed at your current main workplace? (Please enter all that apply or enter 0 into ones that have no others )

|                                                                     | Number               |
|---------------------------------------------------------------------|----------------------|
| Other allied health professionals                                   | <input type="text"/> |
| Podiatry assistants                                                 | <input type="text"/> |
| Medical staff (GP and/or specialists)                               | <input type="text"/> |
| Nurses                                                              | <input type="text"/> |
| Other (please list the worker and how many)<br><input type="text"/> | <input type="text"/> |

9. My opportunities for continuing podiatry education and professional development are:

- Very limited
- Average
- Very good

10. What type of leave do you have access to as part of your employment arrangements (Select all that apply)

- Paid annual leave
- Unpaid annual leave
- Paid sick leave
- No leave available

11. How much leave have you taken in the past 12 months for recreational purposes? (Where you have taken paid and unpaid leave, please select both)

|                                    | Weeks                |
|------------------------------------|----------------------|
| Weeks of paid recreational leave   | <input type="text"/> |
| Weeks of unpaid recreational leave | <input type="text"/> |

12. In your most recent USUAL week at work, for approximately how many HOURS did you undertake work in each of the following settings? (Include ALL of the work you do as a podiatrist)

|                                                                                      | Hours                |
|--------------------------------------------------------------------------------------|----------------------|
| Private practice hours                                                               | <input type="text"/> |
| Community health centre or other state-run primary care organisation hours           | <input type="text"/> |
| Public hospital hours                                                                | <input type="text"/> |
| Private hospital hours                                                               | <input type="text"/> |
| Residential/aged care health facility (nursing/residential home, hospice etc.) hours | <input type="text"/> |
| Tertiary education institution hours                                                 | <input type="text"/> |

|                                                                         | Hours                |
|-------------------------------------------------------------------------|----------------------|
| Other (please list setting and number of hours)<br><input type="text"/> | <input type="text"/> |

13. In question 12, you reported how many HOURS you worked in your MOST RECENT USUAL WEEK. Using this as your total, please break down how you spent these hours on the following activities? (Include ALL of the work you do as a podiatrist in ALL jobs/workplaces)

|                                                                                                                                           | Hours                |
|-------------------------------------------------------------------------------------------------------------------------------------------|----------------------|
| Direct patient care hours (face-to-face, phone consultations, home visits, including any patient care with a student you are supervising) | <input type="text"/> |
| Indirect patient care hours (patient notes, reports, phone calls, care planning meetings)                                                 | <input type="text"/> |
| Education activity hours (teaching, research, continuing education)                                                                       | <input type="text"/> |
| Practice management hours (including supervision of staff, ordering stock, advertising etc)                                               | <input type="text"/> |
| Other (please report what and how many hours)<br><input type="text"/>                                                                     | <input type="text"/> |

14. For how many years did you live in a rural area up until the age you left secondary school?

0 years, did not live rurally

Years

14a. Please indicate the town name and state of the main rural area where you lived up until school leaving age.

Town

State

**D) About your workload**

Has your workload changed since completing survey three in 2019?

Yes

No

**D) About your workload**

1. In your most recent USUAL week at work, for around HOW MANY patients did you provide care? (Include new and existing patients in ALL SETTINGS—eg. hospital and private practice—procedures and telephone consultations for day time and out of hours)

**Place a 0 (zero) if you do not see any patients in that setting.**

|                                              | Number               |
|----------------------------------------------|----------------------|
| Private practice                             | <input type="text"/> |
| Hospital/community health                    | <input type="text"/> |
| Home visit/ Residential Aged Care facilities | <input type="text"/> |

2. Excluding emergencies or urgent needs, for how many days does a patient typically have to wait for an appointment with you or a podiatrist in your workplace:

- Less than 3 work days
- 4-7 work days
- 7-14 work days
- Greater than 15 workdays
- Not applicable

3. For patients who attend with a Medicare chronic disease management plan, do you usually bulk bill?

- Yes
- No
- My workplace doesn't accept Medicare chronic disease management plans
- Not applicable

4. What percentage of your usual clinical load involves Medicare chronic disease management plans that are bulk billed?

- <25%
- 25-50%
- 51-75%
- >75%

5. What percentage of your usual clinical load involves telehealth consultations?

- 0%
- 1-24%
- 25-50%
- 51-75%
- >75%
- Not applicable

6. Are you registered or accept patients who have NDIS funding? (If you are unsure, select no)

- Yes
- No

What percentage of your usual clinical load involves assessing or treating patients who have NDIS funding?

- <25%
- 25-50%
- 51-75%
- >75%
- Not applicable

What percentage of your usual working week involves home visits where care is provided in a person's home or residential aged care facility?

- <50%
- 50-99%
- 100%
- Not applicable

How long does your average consultation last?

- <10 minutes
- 11-15 minutes
- 16-20 minutes
- 21-30 minutes
- >31 minutes
- Not applicable

Do you intend on undertaking the requirements set out by the Podiatry Board of Australia to become an endorsed prescriber?

- Yes
- Unsure
- No
- I am currently in the process of undertaking the requirements for endorsement
- I have already been endorsed to prescribe

**E) About your geographic location**

Have you moved house/unit since completing survey three in 2019?

- Yes
- No

**E) About your geographic location**

1. What is the suburb and postcode where you live?

Suburb

Postcode

2. The opportunities for social interaction for you and your family in the geographic location of your main workplace are:

- Very limited
- Average
- Very good

3. Please indicate the degree to which you agree or disagree with the following statements.

|                                                                                   | Strongly agree        | Agree                 | Neither agree nor disagree | Disagree              | Strongly disagree     | Not Applicable        |
|-----------------------------------------------------------------------------------|-----------------------|-----------------------|----------------------------|-----------------------|-----------------------|-----------------------|
| I don't have many friends or family members in my current work location           | <input type="radio"/> | <input type="radio"/> | <input type="radio"/>      | <input type="radio"/> | <input type="radio"/> | <input type="radio"/> |
| It is easy to pursue my hobbies and leisure interests in my current work location | <input type="radio"/> | <input type="radio"/> | <input type="radio"/>      | <input type="radio"/> | <input type="radio"/> | <input type="radio"/> |
| My partner does not have many friends or family members in this work location     | <input type="radio"/> | <input type="radio"/> | <input type="radio"/>      | <input type="radio"/> | <input type="radio"/> | <input type="radio"/> |
| There are good employment opportunities for my partner in this work location      | <input type="radio"/> | <input type="radio"/> | <input type="radio"/>      | <input type="radio"/> | <input type="radio"/> | <input type="radio"/> |
| The choice of schools for our children is adequate in this work location          | <input type="radio"/> | <input type="radio"/> | <input type="radio"/>      | <input type="radio"/> | <input type="radio"/> | <input type="radio"/> |



**F) About you**

1. Year of Birth (Full year: i.e. 1980 not 80)

2. Gender

- Male
- Female
- Intersex
- Prefer not to answer

3. In what year did you complete your podiatry degree? (Full year: i.e. 1980 not 80)

4. In which country did you complete your podiatry degree?

- Australia
- New Zealand
- United Kingdom
- Other, please list

5. Where did you complete your podiatry training?

- La Trobe University, Bundoora
- La Trobe University, Bendigo
- Western Sydney University
- Queensland University of Technology
- University of Newcastle
- Charles Sturt University, Albury-Wodonga
- University of South Australia
- Southern Cross University
- University of Western Australia
- Central Queensland University
- Other

6. Did you complete any rural or regional placements?

- Yes, Where?

- No

7. In general, would you say your health is:

- Excellent
- Very Good
- Good
- Fair
- Poor

**Part B- Psychological Distress**

We are interested in understanding some of the aspects about your health that may impact your work. Part B will focus on measuring impacts of distress, resilience and burnout.

Please note all data collected is confidential and you will not be asked to give any identifying information in a way that your results can be matched to you.

If any of the follow questions make you feel uncomfortable you can close the survey window. If you need further help, please call **Life Line: 13 11 14** or see your general practitioner.

**1. Brief Resilience Scale**

|                                                             | Strongly Disagree     | Disagree              | Neutral               | Agree                 | Strongly Agree        |
|-------------------------------------------------------------|-----------------------|-----------------------|-----------------------|-----------------------|-----------------------|
| I tend to bounce back quickly after hard times              | <input type="radio"/> | <input type="radio"/> | <input type="radio"/> | <input type="radio"/> | <input type="radio"/> |
| I have a hard time making it through stressful events       | <input type="radio"/> | <input type="radio"/> | <input type="radio"/> | <input type="radio"/> | <input type="radio"/> |
| It does not take me long to recover from a stressful event  | <input type="radio"/> | <input type="radio"/> | <input type="radio"/> | <input type="radio"/> | <input type="radio"/> |
| It is hard for me to snap back when something bad happens   | <input type="radio"/> | <input type="radio"/> | <input type="radio"/> | <input type="radio"/> | <input type="radio"/> |
| I usually come through difficult times with little trouble  | <input type="radio"/> | <input type="radio"/> | <input type="radio"/> | <input type="radio"/> | <input type="radio"/> |
| I tend to take a long time to get over set-backs in my life | <input type="radio"/> | <input type="radio"/> | <input type="radio"/> | <input type="radio"/> | <input type="radio"/> |

2. Allied Health professionals frequently have staff-client interaction that are based primarily around the client’s current problems (psychological, social or physical). Solutions to the client’s issues may not always be obvious. Sometimes the chronic stress of working with these individuals can be emotionally draining and lead to burnout.

The Maslach Burnout Inventory is a tool used to assess Burnout. Please answer the following statements;

|                                                                                      | Everyday              | A few times a week    | Once a week           | A few times a month   | Once a month or less  | A few times a year    | Never                 |
|--------------------------------------------------------------------------------------|-----------------------|-----------------------|-----------------------|-----------------------|-----------------------|-----------------------|-----------------------|
| I deal very effectively with the problems of my patients                             | <input type="radio"/> | <input type="radio"/> | <input type="radio"/> | <input type="radio"/> | <input type="radio"/> | <input type="radio"/> | <input type="radio"/> |
| I feel I treat some patients as if they were impersonal objects                      | <input type="radio"/> | <input type="radio"/> | <input type="radio"/> | <input type="radio"/> | <input type="radio"/> | <input type="radio"/> | <input type="radio"/> |
| I feel emotionally drained from my work                                              | <input type="radio"/> | <input type="radio"/> | <input type="radio"/> | <input type="radio"/> | <input type="radio"/> | <input type="radio"/> | <input type="radio"/> |
| I feel fatigued when I get up in the morning and have to face another day on the job | <input type="radio"/> | <input type="radio"/> | <input type="radio"/> | <input type="radio"/> | <input type="radio"/> | <input type="radio"/> | <input type="radio"/> |
| I've become more callous towards people since I took this job                        | <input type="radio"/> | <input type="radio"/> | <input type="radio"/> | <input type="radio"/> | <input type="radio"/> | <input type="radio"/> | <input type="radio"/> |
| I feel I'm positively influencing other people's lives through my work               | <input type="radio"/> | <input type="radio"/> | <input type="radio"/> | <input type="radio"/> | <input type="radio"/> | <input type="radio"/> | <input type="radio"/> |
| Working with people all day is really a strain for me                                | <input type="radio"/> | <input type="radio"/> | <input type="radio"/> | <input type="radio"/> | <input type="radio"/> | <input type="radio"/> | <input type="radio"/> |
| I don't really care what happens to some patients                                    | <input type="radio"/> | <input type="radio"/> | <input type="radio"/> | <input type="radio"/> | <input type="radio"/> | <input type="radio"/> | <input type="radio"/> |
| I feel exhilarated after working closely with my patients                            | <input type="radio"/> | <input type="radio"/> | <input type="radio"/> | <input type="radio"/> | <input type="radio"/> | <input type="radio"/> | <input type="radio"/> |
| I think of giving up podiatry for another career                                     | <input type="radio"/> | <input type="radio"/> | <input type="radio"/> | <input type="radio"/> | <input type="radio"/> | <input type="radio"/> | <input type="radio"/> |
| I reflect on the satisfaction I get from being a podiatrist                          | <input type="radio"/> | <input type="radio"/> | <input type="radio"/> | <input type="radio"/> | <input type="radio"/> | <input type="radio"/> | <input type="radio"/> |
| I regret my decision to become a podiatrist                                          | <input type="radio"/> | <input type="radio"/> | <input type="radio"/> | <input type="radio"/> | <input type="radio"/> | <input type="radio"/> | <input type="radio"/> |

**3. The Ten-Item Personality Inventory (TIPI)**

I see myself as:

|                              | Disagree strongly     | Disagree moderately   | Disagree a little     | Neither agree nor disagree | Agree a little        | Agree moderately      | Agree strongly        |
|------------------------------|-----------------------|-----------------------|-----------------------|----------------------------|-----------------------|-----------------------|-----------------------|
| 1. Extraverted, enthusiastic | <input type="radio"/> | <input type="radio"/> | <input type="radio"/> | <input type="radio"/>      | <input type="radio"/> | <input type="radio"/> | <input type="radio"/> |
| 2. Critical, quarrelsome     | <input type="radio"/> | <input type="radio"/> | <input type="radio"/> | <input type="radio"/>      | <input type="radio"/> | <input type="radio"/> | <input type="radio"/> |

|                                     | Disagree strongly     | Disagree moderately   | Disagree a little     | Neither agree nor disagree | Agree a little        | Agree moderately      | Agree strongly        |
|-------------------------------------|-----------------------|-----------------------|-----------------------|----------------------------|-----------------------|-----------------------|-----------------------|
| 3. Dependable, self-disciplined     | <input type="radio"/> | <input type="radio"/> | <input type="radio"/> | <input type="radio"/>      | <input type="radio"/> | <input type="radio"/> | <input type="radio"/> |
| 4. Anxious, easily upset            | <input type="radio"/> | <input type="radio"/> | <input type="radio"/> | <input type="radio"/>      | <input type="radio"/> | <input type="radio"/> | <input type="radio"/> |
| 5. Open to new experiences, complex | <input type="radio"/> | <input type="radio"/> | <input type="radio"/> | <input type="radio"/>      | <input type="radio"/> | <input type="radio"/> | <input type="radio"/> |
| 6. Reserved, quiet                  | <input type="radio"/> | <input type="radio"/> | <input type="radio"/> | <input type="radio"/>      | <input type="radio"/> | <input type="radio"/> | <input type="radio"/> |
| 7. Sympathetic, warm                | <input type="radio"/> | <input type="radio"/> | <input type="radio"/> | <input type="radio"/>      | <input type="radio"/> | <input type="radio"/> | <input type="radio"/> |
| 8. Disorganised, careless           | <input type="radio"/> | <input type="radio"/> | <input type="radio"/> | <input type="radio"/>      | <input type="radio"/> | <input type="radio"/> | <input type="radio"/> |
| 9. Calm, emotionally stable         | <input type="radio"/> | <input type="radio"/> | <input type="radio"/> | <input type="radio"/>      | <input type="radio"/> | <input type="radio"/> | <input type="radio"/> |
| 10. Conventional, uncreative        | <input type="radio"/> | <input type="radio"/> | <input type="radio"/> | <input type="radio"/>      | <input type="radio"/> | <input type="radio"/> | <input type="radio"/> |

4. The personal life events listed below can have an important influence on person's work-life balance.

For each statement below, please indicate 'YES' or 'NO' as to whether you experienced the event during the past 12 months. For each statement you answer 'YES', please indicate how long ago the event occurred or commenced.

|                                                                         | No                       | Yes                      | 0-3 months ago           | 4 to 6 months ago        | 7 to 9 months ago        | 10 to 12 months ago      |
|-------------------------------------------------------------------------|--------------------------|--------------------------|--------------------------|--------------------------|--------------------------|--------------------------|
| Serious personal injury or illness to self                              | <input type="checkbox"/> | <input type="checkbox"/> | <input type="checkbox"/> | <input type="checkbox"/> | <input type="checkbox"/> | <input type="checkbox"/> |
| Serious personal injury or illness to a close relative or family member | <input type="checkbox"/> | <input type="checkbox"/> | <input type="checkbox"/> | <input type="checkbox"/> | <input type="checkbox"/> | <input type="checkbox"/> |
| Death of spouse or child                                                | <input type="checkbox"/> | <input type="checkbox"/> | <input type="checkbox"/> | <input type="checkbox"/> | <input type="checkbox"/> | <input type="checkbox"/> |
| Death of other close relative or family member (e.g parent or sibling)  | <input type="checkbox"/> | <input type="checkbox"/> | <input type="checkbox"/> | <input type="checkbox"/> | <input type="checkbox"/> | <input type="checkbox"/> |
| Death of a close friend                                                 | <input type="checkbox"/> | <input type="checkbox"/> | <input type="checkbox"/> | <input type="checkbox"/> | <input type="checkbox"/> | <input type="checkbox"/> |
| Victim of physical violence (e.g assault)                               | <input type="checkbox"/> | <input type="checkbox"/> | <input type="checkbox"/> | <input type="checkbox"/> | <input type="checkbox"/> | <input type="checkbox"/> |
| Victim of property crime (e.g theft, housebreaking)                     | <input type="checkbox"/> | <input type="checkbox"/> | <input type="checkbox"/> | <input type="checkbox"/> | <input type="checkbox"/> | <input type="checkbox"/> |
| Named as defendant in a medical negligence claim                        | <input type="checkbox"/> | <input type="checkbox"/> | <input type="checkbox"/> | <input type="checkbox"/> | <input type="checkbox"/> | <input type="checkbox"/> |

5. This question asks about everyday risk-taking in relation to different types of activities.

How likely are you to engage in each of the following activities?

|                                                                                                       | 1. Very unlikely      | 2. Unlikely           | 3. Neutral            | 4. Likely             | 5. Very likely        |
|-------------------------------------------------------------------------------------------------------|-----------------------|-----------------------|-----------------------|-----------------------|-----------------------|
| Financial risks (e.g investments with an uncertain outcome)                                           | <input type="radio"/> | <input type="radio"/> | <input type="radio"/> | <input type="radio"/> | <input type="radio"/> |
| Career and professional risks (e.g. publicly challenging your professional colleagues)                | <input type="radio"/> | <input type="radio"/> | <input type="radio"/> | <input type="radio"/> | <input type="radio"/> |
| Clinical risks (e.g recommending a treatment which is new to your usual practice or is controversial) | <input type="radio"/> | <input type="radio"/> | <input type="radio"/> | <input type="radio"/> | <input type="radio"/> |

6. These questions concern how you have been feeling over the past 30 days. Tick a box below each question that best represents how you have been.

|                                                                                                    | 1. None of the time   | 2. A little of the time | 3. Some of the time   | 4. Most of the time   | 5. All of the time    |
|----------------------------------------------------------------------------------------------------|-----------------------|-------------------------|-----------------------|-----------------------|-----------------------|
| During the last 30 days, about how often did you feel tired out for no good reason?                | <input type="radio"/> | <input type="radio"/>   | <input type="radio"/> | <input type="radio"/> | <input type="radio"/> |
| During the last 30 days, about how often did you feel nervous?                                     | <input type="radio"/> | <input type="radio"/>   | <input type="radio"/> | <input type="radio"/> | <input type="radio"/> |
| During the last 30 days, about how often did you feel so nervous that nothing could calm you down? | <input type="radio"/> | <input type="radio"/>   | <input type="radio"/> | <input type="radio"/> | <input type="radio"/> |
| During the last 30 days, about how often did you feel hopeless?                                    | <input type="radio"/> | <input type="radio"/>   | <input type="radio"/> | <input type="radio"/> | <input type="radio"/> |
| During the last 30 days, about how often did you feel restless or fidgety?                         | <input type="radio"/> | <input type="radio"/>   | <input type="radio"/> | <input type="radio"/> | <input type="radio"/> |

|                                                                                               | 1. None of the time   | 2. A little of the time | 3. Some of the time   | 4. Most of the time   | 5. All of the time    |
|-----------------------------------------------------------------------------------------------|-----------------------|-------------------------|-----------------------|-----------------------|-----------------------|
| During the last 30 days, about how often did you feel so restless you could not sit still?    | <input type="radio"/> | <input type="radio"/>   | <input type="radio"/> | <input type="radio"/> | <input type="radio"/> |
| During the last 30 days, about how often did you feel depressed?                              | <input type="radio"/> | <input type="radio"/>   | <input type="radio"/> | <input type="radio"/> | <input type="radio"/> |
| During the last 30 days, about how often did you feel that everything was an effort?          | <input type="radio"/> | <input type="radio"/>   | <input type="radio"/> | <input type="radio"/> | <input type="radio"/> |
| During the last 30 days, about how often did you feel so sad that nothing could cheer you up? | <input type="radio"/> | <input type="radio"/>   | <input type="radio"/> | <input type="radio"/> | <input type="radio"/> |
| During the last 30 days, about how often did you feel worthless?                              | <input type="radio"/> | <input type="radio"/>   | <input type="radio"/> | <input type="radio"/> | <input type="radio"/> |

**Part C- Life long learning and social media use**

We are interested to understand the different ways podiatrists network and continue to learn.

Engagement, networking and learning are known protective factors to the health and well being of professionals.

We are interested in the ways you continue to learn throughout your career. This can be measured through scales of life long learning attributes.

We are also interested in understand your use of social media use as a mechanism for engagement and networking both professionally and personally.

Please remember all data collected is confidential and no identifying information is collected or matched in a way to identify you.

1. The Revised Jefferson Scale of Lifelong learning is a tool used to assess how you continue to learn throughout your career.

Please indicate the extent of your agreement with each of the following statements.

|                                                                                                                                    | Strongly Disagree     | Disagree              | Agree                 | Strongly Agree        |
|------------------------------------------------------------------------------------------------------------------------------------|-----------------------|-----------------------|-----------------------|-----------------------|
| Searching for the answer to a question is, in and by itself rewarding                                                              | <input type="radio"/> | <input type="radio"/> | <input type="radio"/> | <input type="radio"/> |
| Life-long learning is a professional responsibility for all health practitioners                                                   | <input type="radio"/> | <input type="radio"/> | <input type="radio"/> | <input type="radio"/> |
| I enjoy reading articles in which interest of my professional interest are discussed                                               | <input type="radio"/> | <input type="radio"/> | <input type="radio"/> | <input type="radio"/> |
| I routinely attend annual meetings run by professional podiatry organisations                                                      | <input type="radio"/> | <input type="radio"/> | <input type="radio"/> | <input type="radio"/> |
| I read professional journals at least once every week                                                                              | <input type="radio"/> | <input type="radio"/> | <input type="radio"/> | <input type="radio"/> |
| I routinely search computer databases to find out about new developments in podiatry                                               | <input type="radio"/> | <input type="radio"/> | <input type="radio"/> | <input type="radio"/> |
| I believe that I would fall behind if I stopped learning about new developments in my profession                                   | <input type="radio"/> | <input type="radio"/> | <input type="radio"/> | <input type="radio"/> |
| One of the most important goals of university is to develop students' life-long learning skills                                    | <input type="radio"/> | <input type="radio"/> | <input type="radio"/> | <input type="radio"/> |
| Rapid changes in medical science require constant updating of knowledge and development of new professional skills                 | <input type="radio"/> | <input type="radio"/> | <input type="radio"/> | <input type="radio"/> |
| I always make time for self-directed learning, even when I have a busy work schedule and other professional and family obligations | <input type="radio"/> | <input type="radio"/> | <input type="radio"/> | <input type="radio"/> |
| I recognise my need to constantly acquire new professional knowledge                                                               | <input type="radio"/> | <input type="radio"/> | <input type="radio"/> | <input type="radio"/> |

|                                                                                                          | Strongly Disagree     | Disagree              | Agree                 | Strongly Agree        |
|----------------------------------------------------------------------------------------------------------|-----------------------|-----------------------|-----------------------|-----------------------|
| I routinely attend continuing podiatry education programs to improve patient care                        | <input type="radio"/> | <input type="radio"/> | <input type="radio"/> | <input type="radio"/> |
| I take every opportunity to gain new knowledge/skills that are important to my profession                | <input type="radio"/> | <input type="radio"/> | <input type="radio"/> | <input type="radio"/> |
| My preferred approach in finding an answer to a question is to search the appropriate computer databases | <input type="radio"/> | <input type="radio"/> | <input type="radio"/> | <input type="radio"/> |

2. The following questions relate to your use and attitudes towards social media.

What is your attitude towards social media?

| Waste of time         |                       |                       |                       |                       |                       |                       |                       |                       |                       | Essential use         |
|-----------------------|-----------------------|-----------------------|-----------------------|-----------------------|-----------------------|-----------------------|-----------------------|-----------------------|-----------------------|-----------------------|
| 0                     | 1                     | 2                     | 3                     | 4                     | 5                     | 6                     | 7                     | 8                     | 9                     | 10                    |
| <input type="radio"/> | <input type="radio"/> | <input type="radio"/> | <input type="radio"/> | <input type="radio"/> | <input type="radio"/> | <input type="radio"/> | <input type="radio"/> | <input type="radio"/> | <input type="radio"/> | <input type="radio"/> |

3. Please indicate the degree to which you agree or disagree with the following statements.

|                                                                                             | Strongly disagree     | Disagree moderately   | Disagree a little     | Neither disagree nor agree | Agree a little        | Agree moderately      | Strongly agree        |
|---------------------------------------------------------------------------------------------|-----------------------|-----------------------|-----------------------|----------------------------|-----------------------|-----------------------|-----------------------|
| I find social media useful in my daily life                                                 | <input type="radio"/> | <input type="radio"/> | <input type="radio"/> | <input type="radio"/>      | <input type="radio"/> | <input type="radio"/> | <input type="radio"/> |
| Using social media increases my productivity                                                | <input type="radio"/> | <input type="radio"/> | <input type="radio"/> | <input type="radio"/>      | <input type="radio"/> | <input type="radio"/> | <input type="radio"/> |
| Using social media improves my interpersonal skills                                         | <input type="radio"/> | <input type="radio"/> | <input type="radio"/> | <input type="radio"/>      | <input type="radio"/> | <input type="radio"/> | <input type="radio"/> |
| Using social media supports the exchange of knowledge                                       | <input type="radio"/> | <input type="radio"/> | <input type="radio"/> | <input type="radio"/>      | <input type="radio"/> | <input type="radio"/> | <input type="radio"/> |
| Learning to use social media is easy for me                                                 | <input type="radio"/> | <input type="radio"/> | <input type="radio"/> | <input type="radio"/>      | <input type="radio"/> | <input type="radio"/> | <input type="radio"/> |
| My interaction with social media is clear and understandable                                | <input type="radio"/> | <input type="radio"/> | <input type="radio"/> | <input type="radio"/>      | <input type="radio"/> | <input type="radio"/> | <input type="radio"/> |
| I find social media easy to use                                                             | <input type="radio"/> | <input type="radio"/> | <input type="radio"/> | <input type="radio"/>      | <input type="radio"/> | <input type="radio"/> | <input type="radio"/> |
| It is easy for me to become skillful at using social media                                  | <input type="radio"/> | <input type="radio"/> | <input type="radio"/> | <input type="radio"/>      | <input type="radio"/> | <input type="radio"/> | <input type="radio"/> |
| People in my practice setting who use social media have more prestige than those who do not | <input type="radio"/> | <input type="radio"/> | <input type="radio"/> | <input type="radio"/>      | <input type="radio"/> | <input type="radio"/> | <input type="radio"/> |
| People in my practice setting who use social media have a high profile                      | <input type="radio"/> | <input type="radio"/> | <input type="radio"/> | <input type="radio"/>      | <input type="radio"/> | <input type="radio"/> | <input type="radio"/> |
| Using social media is a status symbol in my practice setting                                | <input type="radio"/> | <input type="radio"/> | <input type="radio"/> | <input type="radio"/>      | <input type="radio"/> | <input type="radio"/> | <input type="radio"/> |
| People whose opinion I value prefer me to use social media                                  | <input type="radio"/> | <input type="radio"/> | <input type="radio"/> | <input type="radio"/>      | <input type="radio"/> | <input type="radio"/> | <input type="radio"/> |
| At work, my colleagues who are important to me, think I should use social media             | <input type="radio"/> | <input type="radio"/> | <input type="radio"/> | <input type="radio"/>      | <input type="radio"/> | <input type="radio"/> | <input type="radio"/> |
| People who are important to me think that I should use social media                         | <input type="radio"/> | <input type="radio"/> | <input type="radio"/> | <input type="radio"/>      | <input type="radio"/> | <input type="radio"/> | <input type="radio"/> |
| I am able to use social media in my work                                                    | <input type="radio"/> | <input type="radio"/> | <input type="radio"/> | <input type="radio"/>      | <input type="radio"/> | <input type="radio"/> | <input type="radio"/> |
| I am able to use social media despite the legal concern                                     | <input type="radio"/> | <input type="radio"/> | <input type="radio"/> | <input type="radio"/>      | <input type="radio"/> | <input type="radio"/> | <input type="radio"/> |
| I am able to use social media despite the privacy concern                                   | <input type="radio"/> | <input type="radio"/> | <input type="radio"/> | <input type="radio"/>      | <input type="radio"/> | <input type="radio"/> | <input type="radio"/> |
| I am able to use social media despite the ethical concern                                   | <input type="radio"/> | <input type="radio"/> | <input type="radio"/> | <input type="radio"/>      | <input type="radio"/> | <input type="radio"/> | <input type="radio"/> |
| The use of social media has become a habit for me                                           | <input type="radio"/> | <input type="radio"/> | <input type="radio"/> | <input type="radio"/>      | <input type="radio"/> | <input type="radio"/> | <input type="radio"/> |
| I am addicted to using social media                                                         | <input type="radio"/> | <input type="radio"/> | <input type="radio"/> | <input type="radio"/>      | <input type="radio"/> | <input type="radio"/> | <input type="radio"/> |

|                                                                      | Strongly disagree     | Disagree moderately   | Disagree a little     | Neither disagree nor agree | Agree a little        | Agree moderately      | Strongly agree        |
|----------------------------------------------------------------------|-----------------------|-----------------------|-----------------------|----------------------------|-----------------------|-----------------------|-----------------------|
| I must use social media                                              | <input type="radio"/> | <input type="radio"/> | <input type="radio"/> | <input type="radio"/>      | <input type="radio"/> | <input type="radio"/> | <input type="radio"/> |
| I am too busy to participate in social media                         | <input type="radio"/> | <input type="radio"/> | <input type="radio"/> | <input type="radio"/>      | <input type="radio"/> | <input type="radio"/> | <input type="radio"/> |
| I don't have time to use social media for increasing my productivity | <input type="radio"/> | <input type="radio"/> | <input type="radio"/> | <input type="radio"/>      | <input type="radio"/> | <input type="radio"/> | <input type="radio"/> |
| I am concerned about work policies when using social media           | <input type="radio"/> | <input type="radio"/> | <input type="radio"/> | <input type="radio"/>      | <input type="radio"/> | <input type="radio"/> | <input type="radio"/> |

4. Which social media or networking platforms do you engage with?

|                               | Not aware             | Heard of but don't use | Have an account but don't engage with it | Have an account but use occasionally | Current active user   |
|-------------------------------|-----------------------|------------------------|------------------------------------------|--------------------------------------|-----------------------|
| Restricted online communities | <input type="radio"/> | <input type="radio"/>  | <input type="radio"/>                    | <input type="radio"/>                | <input type="radio"/> |
| Facebook                      | <input type="radio"/> | <input type="radio"/>  | <input type="radio"/>                    | <input type="radio"/>                | <input type="radio"/> |
| Twitter                       | <input type="radio"/> | <input type="radio"/>  | <input type="radio"/>                    | <input type="radio"/>                | <input type="radio"/> |
| Instagram                     | <input type="radio"/> | <input type="radio"/>  | <input type="radio"/>                    | <input type="radio"/>                | <input type="radio"/> |
| LinkedIn                      | <input type="radio"/> | <input type="radio"/>  | <input type="radio"/>                    | <input type="radio"/>                | <input type="radio"/> |
| WhatsApp                      | <input type="radio"/> | <input type="radio"/>  | <input type="radio"/>                    | <input type="radio"/>                | <input type="radio"/> |
| YouTube                       | <input type="radio"/> | <input type="radio"/>  | <input type="radio"/>                    | <input type="radio"/>                | <input type="radio"/> |
| Snapchat                      | <input type="radio"/> | <input type="radio"/>  | <input type="radio"/>                    | <input type="radio"/>                | <input type="radio"/> |
| TikTok                        | <input type="radio"/> | <input type="radio"/>  | <input type="radio"/>                    | <input type="radio"/>                | <input type="radio"/> |

5. What is your overall frequency of social media use?

|                                                                                        | Never                 | Once a week           | 2-3 times a week      | 4-6 times a week      | Once per day          | 2-3 times a day       | 4-6 times a day       |
|----------------------------------------------------------------------------------------|-----------------------|-----------------------|-----------------------|-----------------------|-----------------------|-----------------------|-----------------------|
| What is your overall frequency of using social media for knowledge exchange?           | <input type="radio"/> | <input type="radio"/> | <input type="radio"/> | <input type="radio"/> | <input type="radio"/> | <input type="radio"/> | <input type="radio"/> |
| What is your overall frequency of using social media for increasing your productivity? | <input type="radio"/> | <input type="radio"/> | <input type="radio"/> | <input type="radio"/> | <input type="radio"/> | <input type="radio"/> | <input type="radio"/> |
| What is your overall frequency of using social media for interpersonal communication?  | <input type="radio"/> | <input type="radio"/> | <input type="radio"/> | <input type="radio"/> | <input type="radio"/> | <input type="radio"/> | <input type="radio"/> |

**COVID-19 Impact on the Podiatry Profession.**

Lastly, podiatrists have never worked within a pandemic situation. We are keen to briefly hear about it's impact on you, your stock and where you are gathering information to support your practice.

1. Please describe any stock or consumable impact/s of COVID-19 on your practice. Select all that apply.

- I have no stock of some components of PPE (PPE including masks, gowns and gloves) - please describe which you have no stock)
- I have limited stock of some components of PPE (PPE including masks, gowns and gloves) which will run out in the next 7 days - please describe which you have limited stock)
- I have no stock of waterless hand hygiene products
- I have no current issues with consumables (including waterless hand hygiene products) but may within 1 month
- I have no current issues with consumables (including waterless hand hygiene products) but may within 2 months
- I have appropriate consumables (including waterless hand hygiene products) and am comfortable with the plan moving forward to replace them as needed).

2. My working situation during this pandemic is (please the situation which is related to your primary job role):

- I am self employed and it is business as usual and no plans to change in the near future unless directed by regulatory or government bodies
- I am self employed and it is business as usual, but I have developed a clear contingency plan for when I will close the doors to patients
- The business I own has subcontractors, and it is business as usual and no plans to change in the near future unless directed to by regulatory or government bodies.
- The business I own has subcontractors, and it is business as usual. I have a contingency plan for when I will close the door to patients, subcontractors **WILL** be paid at this time
- The business I own has subcontractors, and it is business as usual. I have a contingency plan for when I will close the door to patients, subcontractors **WILL NOT** be paid at this time
- I employ staff, and it is business as usual (with precautions) and no plans to change in the near future unless told to by regulatory or government bodies
- I employ staff, and it is business as usual (with precautions) and have planned for when, or if I will close the door to patients, staff have leave entitlements
- My employer (or business owner) has not made any staffing decisions at this time. I am still working
- My employer (or business owner) has asked me reduce my hours or not come into work at present, but I have paid leave entitlements to supplement my income
- My employer (or business owner) has asked me to reduce my hours or not to come into work at present and I have no paid leave entitlements
- Other (please describe)

Please indicate your use and the helpfulness of information sources in the past week to guide your health and business decision responses to COVID-19.

|                                                                       | Use                            |                          | Perceived helpfulness (if used) |                       |                       |                       |                            |
|-----------------------------------------------------------------------|--------------------------------|--------------------------|---------------------------------|-----------------------|-----------------------|-----------------------|----------------------------|
|                                                                       | I have used in the past 7 days | I have not used          | No help at all                  | Slightly helpful      | Fairly helpful        | Very helpful          | Not Applicable as not used |
| Department of Health (Federal)                                        | <input type="checkbox"/>       | <input type="checkbox"/> | <input type="radio"/>           | <input type="radio"/> | <input type="radio"/> | <input type="radio"/> | <input type="radio"/>      |
| Department of Health (State sites)                                    | <input type="checkbox"/>       | <input type="checkbox"/> | <input type="radio"/>           | <input type="radio"/> | <input type="radio"/> | <input type="radio"/> | <input type="radio"/>      |
| Local health services (their newsletter, website and/or social media) | <input type="checkbox"/>       | <input type="checkbox"/> | <input type="radio"/>           | <input type="radio"/> | <input type="radio"/> | <input type="radio"/> | <input type="radio"/>      |
| APodA (newsletters, social media posts or ringing the local office)   | <input type="checkbox"/>       | <input type="checkbox"/> | <input type="radio"/>           | <input type="radio"/> | <input type="radio"/> | <input type="radio"/> | <input type="radio"/>      |
| Twitter                                                               | <input type="checkbox"/>       | <input type="checkbox"/> | <input type="radio"/>           | <input type="radio"/> | <input type="radio"/> | <input type="radio"/> | <input type="radio"/>      |
| Facebook - general feed or or groups                                  | <input type="checkbox"/>       | <input type="checkbox"/> | <input type="radio"/>           | <input type="radio"/> | <input type="radio"/> | <input type="radio"/> | <input type="radio"/>      |
| Ahpra                                                                 | <input type="checkbox"/>       | <input type="checkbox"/> | <input type="radio"/>           | <input type="radio"/> | <input type="radio"/> | <input type="radio"/> | <input type="radio"/>      |
| Friends and/or family (non-health professionals)                      | <input type="checkbox"/>       | <input type="checkbox"/> | <input type="radio"/>           | <input type="radio"/> | <input type="radio"/> | <input type="radio"/> | <input type="radio"/>      |
| Friends and/or family (health professionals)                          | <input type="checkbox"/>       | <input type="checkbox"/> | <input type="radio"/>           | <input type="radio"/> | <input type="radio"/> | <input type="radio"/> | <input type="radio"/>      |
| COVID-19 Government app                                               | <input type="checkbox"/>       | <input type="checkbox"/> | <input type="radio"/>           | <input type="radio"/> | <input type="radio"/> | <input type="radio"/> | <input type="radio"/>      |
| Other (please describe)<br><input type="text"/>                       | <input type="checkbox"/>       | <input type="checkbox"/> | <input type="radio"/>           | <input type="radio"/> | <input type="radio"/> | <input type="radio"/> | <input type="radio"/>      |

Any other comments on the impact of COVID-19 on your practice:

You will now be directed to a separate survey to enter your contact details if you wish. This is not linked with your responses.

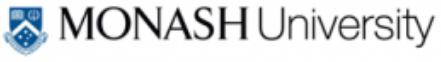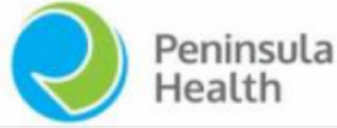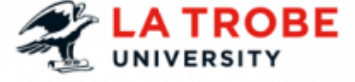

**Block 1**
